# Supplementary material
Source: Springer Nature journal article supplement (https://www.springermedizin.de/resource/supplementary/12933_2013_801_MOESM1_ESM.pdf/9539262)
Supplement: MOESM1 [file 9539262]

**Figure S1**

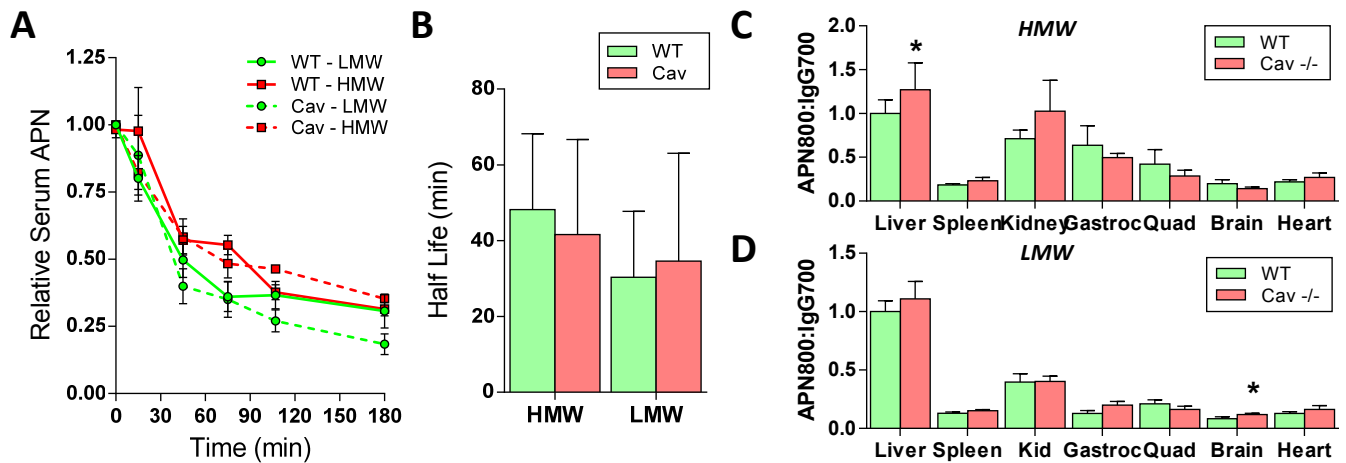

**Supplemental Figure 1:** Tracking labeled adiponectin oligomer circulatory clearance and tissue uptake over time in wild type and *Cav1* knockout mice (*Cav*<sup>-/-</sup>). A) Adiponectin:IgG ratios in sera over time following HMW (red lines) adiponectin or LMW (green lines) injection into wildtype (WT) and caveolin-1 knockout mice (*Cav*<sup>-/-</sup>; dotted lines). B) Lack of caveolar trafficking had no effect on either adiponectin complex half life. C) HMW adiponectin tissue distribution was unchanged in *Cav*<sup>-/-</sup> mice. D) LMW adiponectin concentration was increased in the brains of *Cav*-1 KO mice. Analyses by two-tailed student's t-test with unequal variance. \*  $P < 0.05$ .

**Table S1**

| <b>Gene</b>    | <b>Forward</b>          | <b>Reverse</b>           |
|----------------|-------------------------|--------------------------|
| <i>Cdh5</i>    | TCCTCTGCATCCTCACCATCACA | GTAAGTGACCAACTGCTCGTGAAT |
| <i>Ocln</i>    | CCTTCTGCTTCATCGCTTCC    | AGCGCTGACTATGATCACGA     |
| <i>Tjp1</i>    | TCAGAGCCCTCCGATCATTC    | GCTTTGGGTGGATGATCGTC     |
| <i>Nos3</i>    | TTCCTGGACATCACTTCCCC    | CTCCATTCTTCGTAGCGCC      |
| <i>Cav1</i>    | CCAAGCATCTCAACGACGAC    | CTCCAGATGCCGTCGAAAC      |
| <i>Adipor1</i> | ACGTTGGAGAGTCATCCCGTAT  | CTCTGTGTGGATGCGGAAGAT    |
| <i>Adipor2</i> | TCCCAGGAAGATGAAGGGTTTAT | TTCCATTGTTCCATAGCATGA    |
| <i>Cdh13</i>   | CATCGAAGCTCAAGATATGG    | GATTTCCATTGATGATGGTG     |

**Supplementary Table 1:** Primer sequences used for quantitative PCR measures in murine endothelial cells.
